# Supplementary material for: Self-assembled hydrophobic surface generated from a helical nanofilament (B4) liquid crystal phase
Source: Royal Society of Chemistry journal article supplement (doi:10.1039/c3sm27221d), 2013-01-01
Supplement: c3sm27221d.pdf [file c3sm27221d.pdf]

## Supporting Information for:

# Self-assembled Hydrophobic Surface induced from a Helical Nanofilament (B4) Liquid Crystal Phase

**Hanim Kim,<sup>a</sup> Youngwoo Yi,<sup>b</sup> Dong Chen,<sup>b</sup> Eva Korblova,<sup>c</sup> David M. Walba,<sup>c</sup> Noel A. Clark<sup>\*b</sup> Dong Ki Yoon,<sup>\*a</sup>**

<sup>a</sup> Graduate School of Nanoscience and Technology (WCU), KAIST, Daejeon 305-701, Republic of Korea. Fax: +82 42 350 1110; Tel: +82 42 350 1116; E-mail: [nandk@kaist.ac.kr](mailto:nandk@kaist.ac.kr).

<sup>b</sup> Department of Physics and Liquid Crystal Materials Research Center, University of Colorado, Boulder, CO 80309, USA. Fax: +1 303 492 2998; Tel: +1 303 492 6420; E-mail: [noel.clark@colorado.edu](mailto:noel.clark@colorado.edu)

<sup>c</sup> Department of Chemistry and Liquid Crystal Materials Research Center, University of Colorado, Boulder, CO 80309, USA.

**Figure S1.**

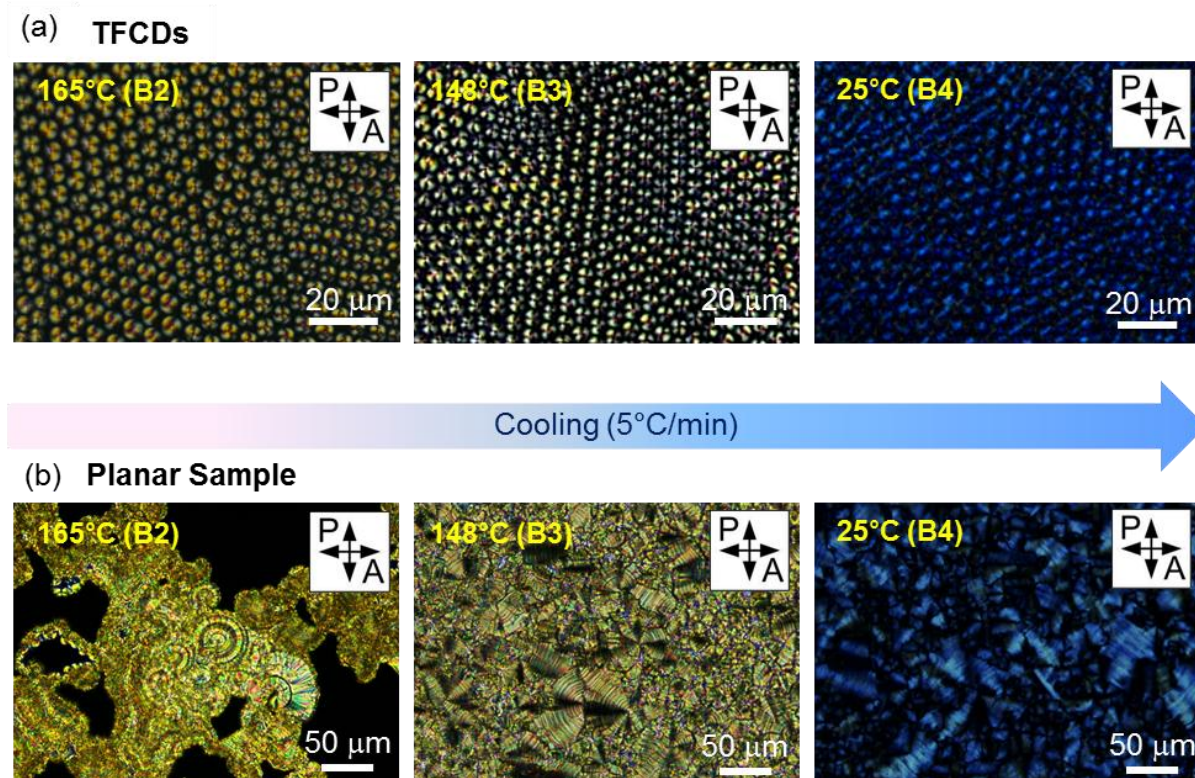

**Fig S1.** DTLM analysis investigating over the whole phase transitions of HNF-formations under two different interfacial conditions to the molecules. (a) When NOBOW molecules exist onto the glass substrate opened to the air the other side, the bending smectic layers are generated forming well-established defect structure, TFCD at B2 phase. After gradual cooling, TFCDs maintain their own macroscopic morphology until to reach B4 helical nanofilament phase but intermediate B3 phase (distorted layer phase) is not clearly observed due to the bending distortion of internal layers. (b) In the case of the molecules confined in between two glass substrates, the B2 layer directions are mostly determined perpendicular to the surface, so further layer distortion steps (B3 and B4 formation) can be distinctively observed which is corresponding to the B2 layer direction.

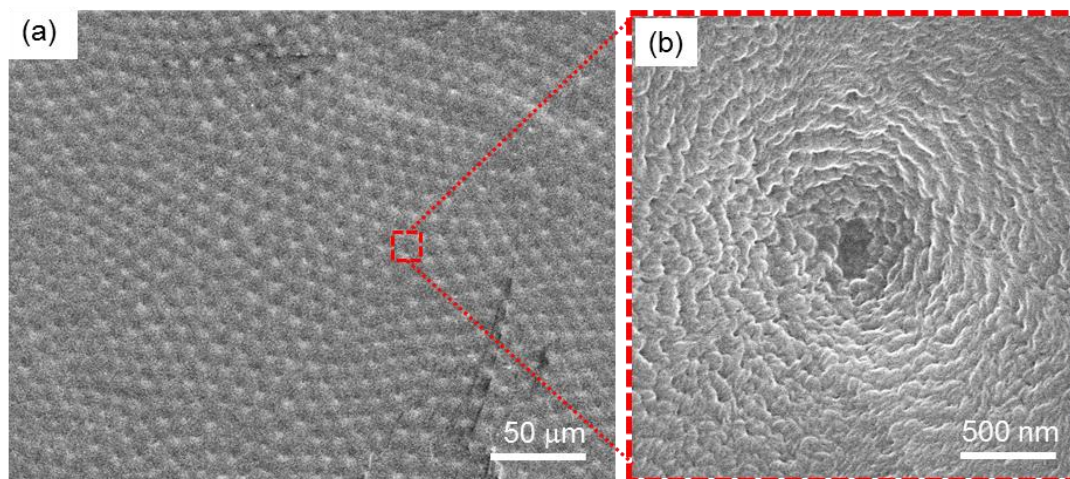

**Fig S2.** SEM images showing the self-ordered micro- and nano-hybrid structures consisting of TFCDs and HNFs. The dual-size hierarchical superstructures are spontaneously generated having highly- and hexagonally ordered TFCDs with very uniform periodicity ( $\sim 10 \mu\text{m}$ ), and HNFs formed along the layer direction of TFCDs. The direction of HNFs follows with the previously formed B2 layer direction by the interfacial conditions of the molecules to the surface. These hierarchical super structures are spontaneously stabilized over large area up to several millimeter-scale.
